# Supplementary material for: A simple electrochemical immunosensor based on a chitosan/reduced graphene oxide nanocomposite for sensitive detection of biomarkers of malignant melanoma
Source: Royal Society of Chemistry journal article supplement (doi:10.1039/d2ra04208h), 2022-01-01
Supplement: d2ra04208h1.pdf [file d2ra04208h1.pdf]

## TABLES

Table S1. Comparison between detection of S-100B using different method.

| Materials                                 | Method               | Linear range<br>(ng/mL)            | LOD<br>(pg/mL)      | Ref.     |
|-------------------------------------------|----------------------|------------------------------------|---------------------|----------|
| MB-Ab/S100B/Ab-QD                         | Fluorescence         | 0.01-30                            | 10                  | 44       |
| IDZB/Cys/GA/anti-S100B                    | EIS                  | 10-10 <sup>4</sup>                 | 10 <sup>4</sup>     | 45       |
| Au-coated magnetic NPs/<br>thiol-ended Ab | DPV                  | 3.7-37                             | 3.7×10 <sup>3</sup> | 46       |
| Ab/rGO-Au                                 | Photoelectrochemical | 2.5×10 <sup>-4</sup> -1            | 0.15                | 47       |
| GSPE/4-NBD/GA/Ab                          | DPV                  | 1-10                               | 1                   | 48       |
| PEI-PMMA/Ab                               | DPV                  | 10 <sup>-4</sup> -10 <sup>-1</sup> | 0.1                 | 49       |
| Ab/GA/CS-rGO/GCE                          | DPV                  | 10 <sup>-2</sup> -10 <sup>3</sup>  | 1.9                 | Our work |

MB: magnetic beads; QD: quantum dots; IDZB: interdigitate-zigzag biochip; Cys: cysteamine; EIS: electrochemical impedance spectroscopy; NPs: nanoparticles; rGO-Au: green reduced graphene oxide and decorated with gold nanoparticles; GSPE: graphene screen printed electrodes; 4-NBD: 4-nitrobenenediazonium; GA: glutaraldehyde; PEI-PMMA: poly(ethyleneimine) modified poly(methyl methacrylate).

## FIGURES

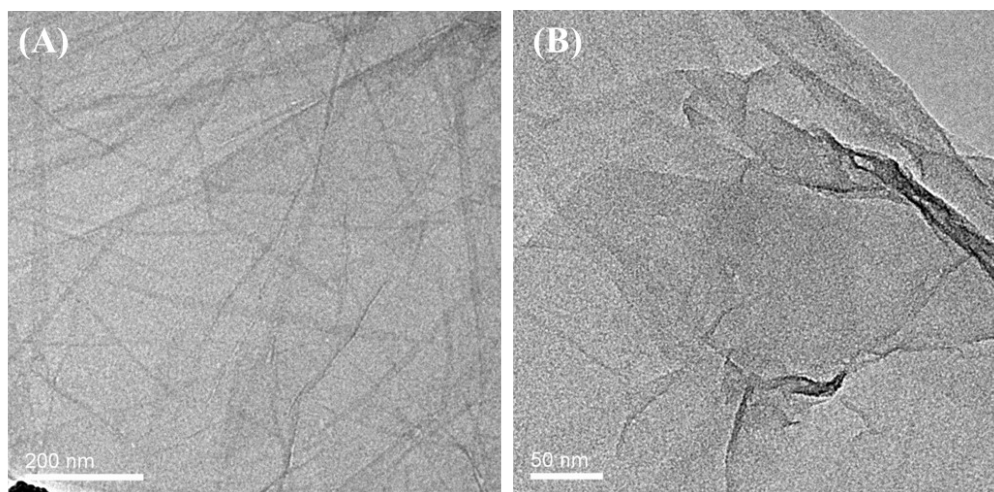

Fig. S1 TEM images of GO (A) and CS-rGO (B).

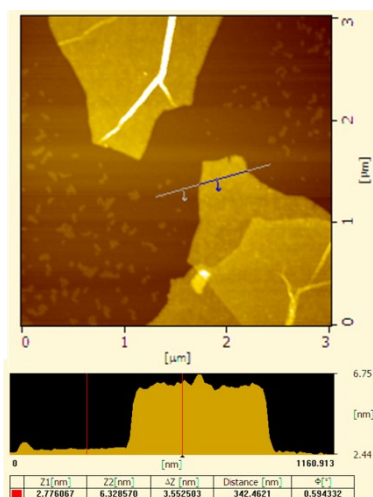

Fig. S2 AFM image (upper) and the corresponding height profiles (below) along the indicated line of CS-rGO.

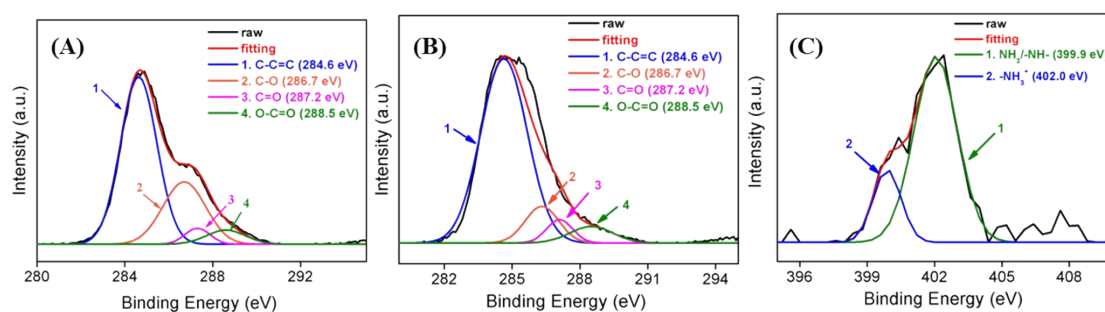

Fig. S3 High-resolution C1s XPS profiles of GO (A) and CS-G (B). High-resolution N1s XPS profile of CS-G (C).

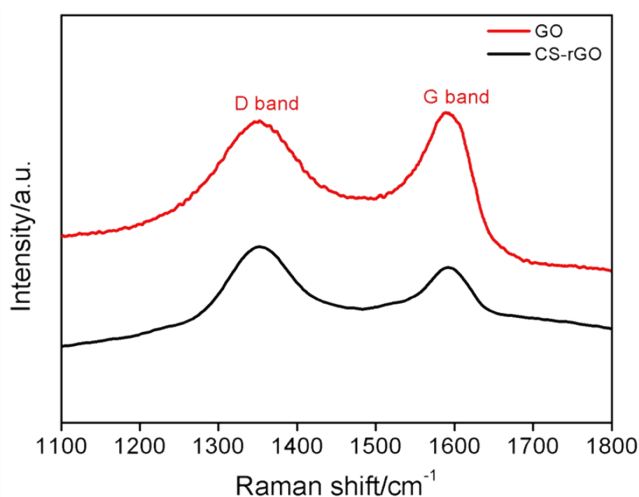

Fig. S4 Raman spectra of GO and CS-rGO.

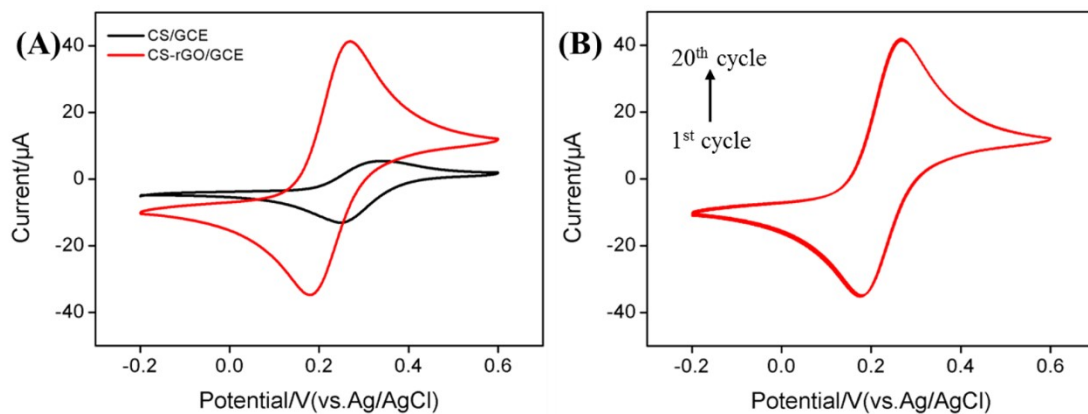

Fig. S5 (A) CV curves obtained on CS/GCE and CS-rGO/GCE. (B) CV curves on CS-rGO/GCE during the continuous 20 scanning cycles. The electrolyte is  $\text{Fe}(\text{CN})_6^{3-/4-}$  (2.5 mM) containing KCl (0.1 M).

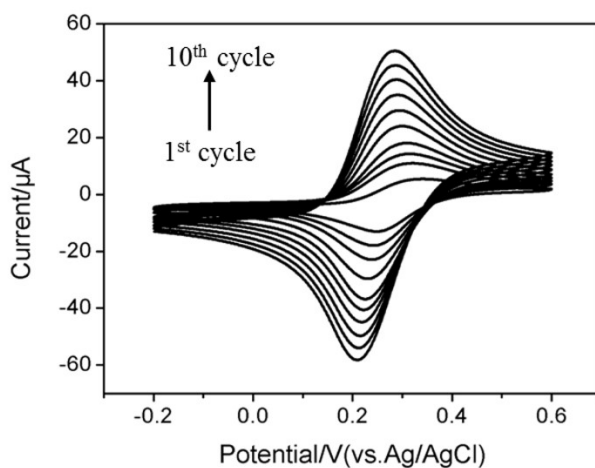

Fig. S6 CV curves on CS/GCE during the continuous 10 scanning cycles in  $\text{Fe}(\text{CN})_6^{3-/4-}$  (2.5 mM) containing KCl (0.1 M).

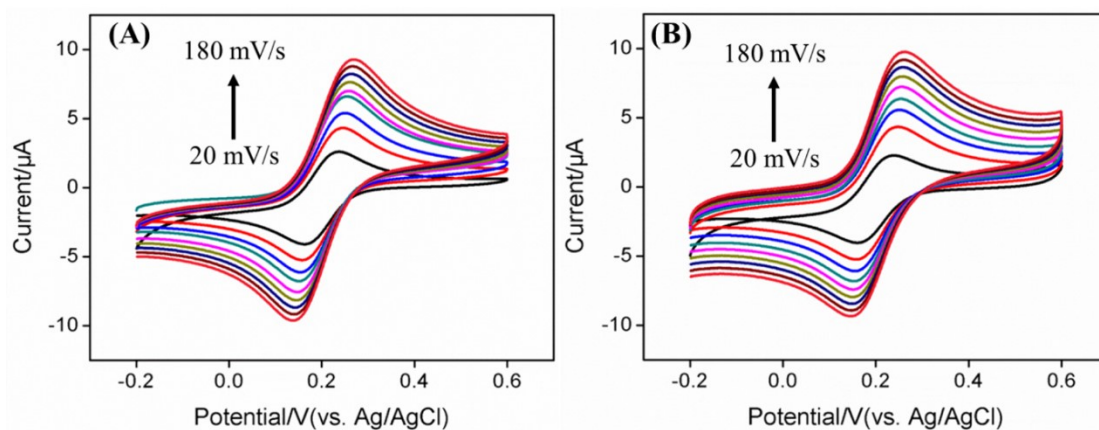

Fig. S7 CV curves of bare GCE (A) CS-rGO/GCE (B) at different scan rates in 0.1 M KCl containing 0.5 mM  $\text{Fe}(\text{CN})_6^{3-/4-}$ .
